# Supplementary material for: Tricholoma matsutake-derived peptide WFNNAGP protects against DSS-induced colitis by ameliorating oxidative stress and intestinal barrier dysfunction
Source: Royal Society of Chemistry journal article supplement (doi:10.1039/d1fo02806e), 2021-01-01
Supplement: d1fo02806e1.xlsx [file d1fo02806e1.xlsx]

## Sheet: Sheet1
	actin	12345678		3456
	occludin	12345678		3456
	ZO-1	12345678		5678
	NLRP3	12345678		3456
	NF-κB	12345678		1234
	Caspase-1	12345678		5678
